# Supplementary material for: Supermolecular theranostic capsules for pH-sensitive magnetic resonance imaging and multi-responsive drug delivery
Source: Royal Society of Chemistry journal article supplement (doi:10.1039/c5tb01092f), 2015-01-01
Supplement: c5tb01092f1.pdf [file c5tb01092f1.pdf]

**Supporting Information**  
*of*  
**“Supramolecular Theranostic Capsules for pH-Sensitive  
Magnetic Resonance Imaging and Multi-responsive Drug  
Delivery”**

Di-Wei Zheng<sup>a</sup>, Qi Lei<sup>b</sup>, Si Chen<sup>b</sup>, Wen-Xiu Qiu<sup>b</sup>, Meng-Yi Liu<sup>a</sup>, Xian Chen<sup>a</sup>, Yu-Xue Ding<sup>a</sup>, Peng-Hui Li<sup>c</sup>, Quan-Yuan Zhang<sup>a</sup>, Zu-Shun Xu<sup>a</sup>, \*, Xian-Zheng Zhang<sup>b</sup>, \*\*, Paul K. Chu<sup>c</sup>\*\*\*.

a Hubei Collaborative Innovation Center for Advanced Organic Chemical Materials, Ministry of Education Key Laboratory for The Green Preparation and Application of Functional Materials, Hubei University, Wuhan, Hubei 430062, China

b Key Laboratory of Biomedical Polymers of Ministry of Education & Department of Chemistry, Wuhan University, Wuhan, Hubei 430072, China

c Department of Physics and Materials Science, City University of Hong Kong, Tat Chee Avenue, Kowloon, Hong Kong, China

\* Corresponding author. Tel.: +86 27 88661729; fax: +86 27 88661729.

\*\* Corresponding author. Tel.: +86 27 68754509; fax: +86 27 68754509.

\*\*\* Corresponding author. Tel.: +852 34427724; fax: +852 34420538.

E-mail addresses: zushunxu@hubu.edu.cn (Z. S. Xu), xz-zhang@whu.edu.cn (X.-Z. Zhang), paul.chu@cityu.edu.hk (P. K. Chu).

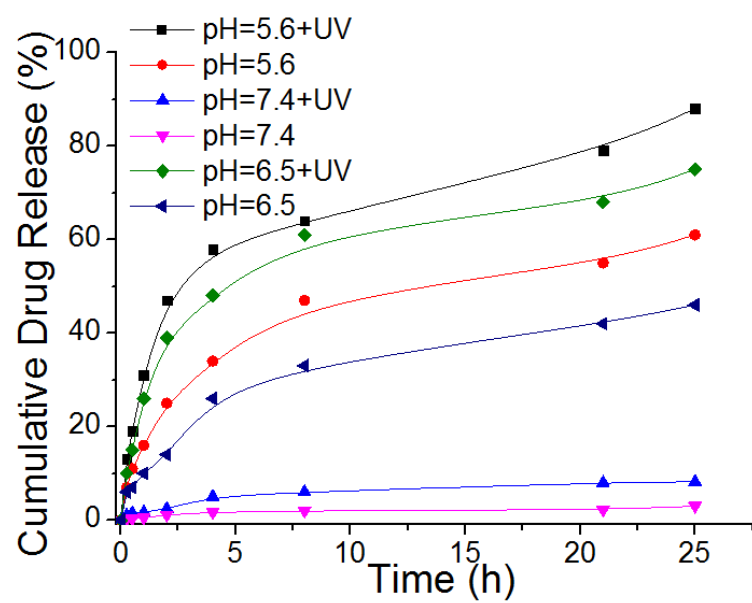

Figure S1. Cumulative drug release from the microcapsules with pH=5.6+UV, pH=5.6, pH=7.4+UV, pH=7.4, pH=6.5+UV or pH=6.5 measured by UV-vis spectrophotometer.

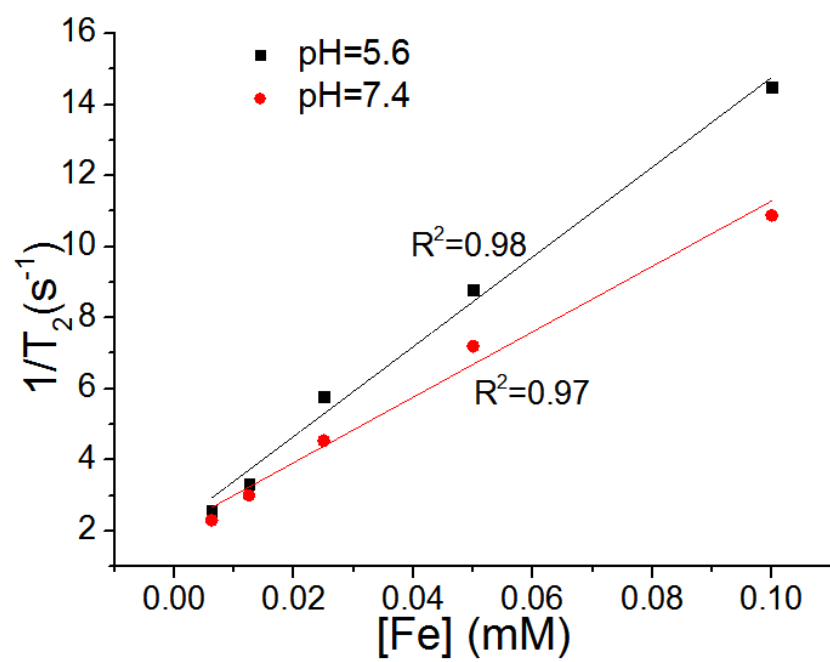

Figure S2.  $1/T_2$ - $[Fe]$  curves of the microcapsules at pH=7.4 and pH=5.6.

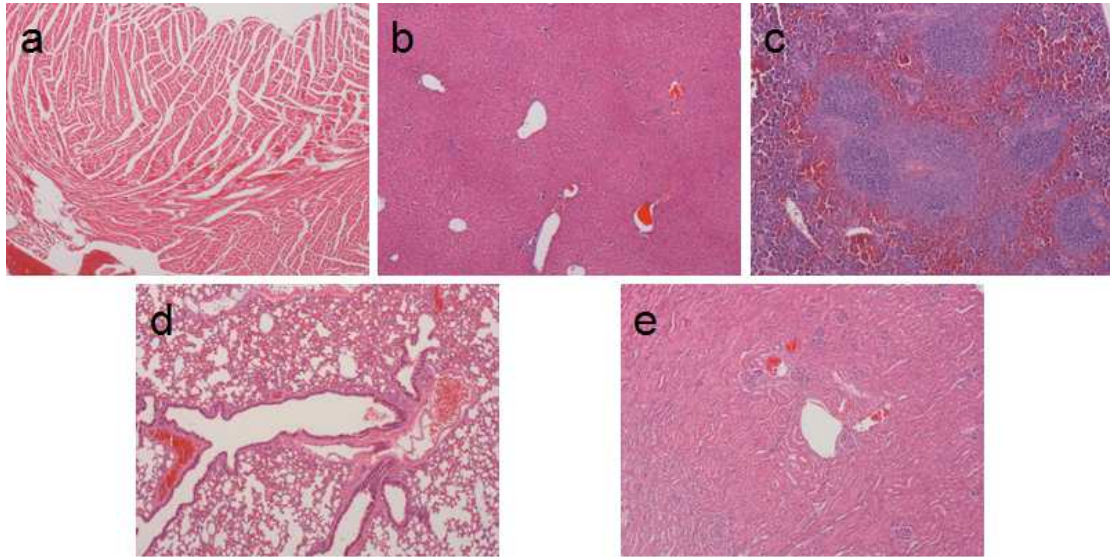

Figure S3. H&E staining (40x) of (a) heart, (b) liver, (c)spleen, (d) lung and (e) kidney 3 days post injection.

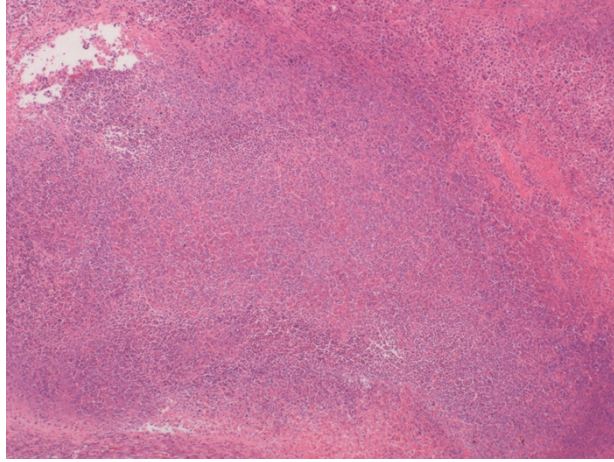

Figure S4. H&E staining (40x) of injection side 3 days post injection.
